# Supplementary material
Source: PubMed Central journal article supplement (PMC10699844)
Supplement: djad148_supplementary_data.pdf [file djad148_supplementary_data.pdf]

## Supplementary Materials

**Supplementary Table 1. Cancers and ICD-O-3 codes examined**

| Disease                                                                 | Code                                                                                                                                                                                                                                            |
|-------------------------------------------------------------------------|-------------------------------------------------------------------------------------------------------------------------------------------------------------------------------------------------------------------------------------------------|
| I. Leukemias, myeloproliferative diseases, and myelodysplastic diseases |                                                                                                                                                                                                                                                 |
| (a) Lymphoid leukemias                                                  | 9820, 9823, 9826, 9827, 9831-9837, 9940, 9948                                                                                                                                                                                                   |
| (b) Acute myeloid leukemias                                             | 9840, 9861, 9866, 9867, 9870-9874, 9891, 9895-9897, 9910, 9920, 9931                                                                                                                                                                            |
| (c) Chronic myeloproliferative diseases                                 | 9863, 9875, 9876, 9950, 9960-9964                                                                                                                                                                                                               |
| (d) Myelodysplastic syndrome and other myeloproliferative diseases      | 9945, 9946, 9975, 9980, 9982-9987, 9989                                                                                                                                                                                                         |
| (e) Unspecified and other specified leukemias                           | 9800, 9801, 9805, 9860, 9930                                                                                                                                                                                                                    |
| II. Lymphomas and reticuloendothelial neoplasms                         |                                                                                                                                                                                                                                                 |
| (a) Hodgkin lymphomas                                                   | 9650-9655, 9659, 9661-9665, 9667                                                                                                                                                                                                                |
| (b) Non-Hodgkin lymphomas (except Burkitt lymphoma)                     | 9591, 9670, 9671, 9673, 9675, 9678-9680, 9684, 9689-9691, 9695, 9698, 9699, 9700-9702, 9705, 9708, 9709, 9714, 9716-9719, 9727-9729, 9731-9734, 9760, 9761, 9762, 9764-9766, 9767, 9768, 9769, 9970                                             |
| (c) Burkitt lymphoma                                                    | 9687                                                                                                                                                                                                                                            |
| (d) Miscellaneous lymphoreticular                                       | 9740-9742, 9750, 9754-9758                                                                                                                                                                                                                      |
| (e) Unspecified lymphomas                                               | 9590, 9596                                                                                                                                                                                                                                      |
| III. CNS and miscellaneous intracranial and intraspinal neoplasms       |                                                                                                                                                                                                                                                 |
| (a.1) Ependymomas                                                       | 9383, 9391-9394                                                                                                                                                                                                                                 |
| (b) Astrocytomas                                                        | 9380, 9384, 9400-9411, 9420-9424, 9425, 9440-9442                                                                                                                                                                                               |
| (c.1) Medulloblastoma                                                   | 9470-9472, 9474-9478, 9480                                                                                                                                                                                                                      |
| (c.2) Primitive neuroectodermal tumor (PNET)                            | 9473                                                                                                                                                                                                                                            |
| (c.3/c.4) Medulloepithelioma/Atypical teratoid/rhabdoid tumor           | 9501-9504, 9508                                                                                                                                                                                                                                 |
| (d) Other gliomas                                                       | 9380, 9381, 9382, 9430, 9444, 9450, 9451, 9460                                                                                                                                                                                                  |
| (e) Other specified intracranial and intraspinal neoplasms              | 8270-8281, 8300, 9350-9352, 9360-9362, 9412, 9413, 9492, 9493, 9505-9507, 9530-9539, 9582                                                                                                                                                       |
| (f) Unspecified intracranial and intraspinal neoplasms                  | 8000-8005                                                                                                                                                                                                                                       |
| IV. Neuroblastoma and other peripheral nervous cell tumors              |                                                                                                                                                                                                                                                 |
| (a) Neuroblastoma and Ganglioneuroblastoma                              | 9490, 9500                                                                                                                                                                                                                                      |
| (b) Other peripheral nervous cell tumors                                | 8680-8683, 8690-8693, 8700, 9520-9523, 9501-9504                                                                                                                                                                                                |
| V. Retinoblastoma                                                       |                                                                                                                                                                                                                                                 |
| Retinoblastoma                                                          | 9510-9514                                                                                                                                                                                                                                       |
| VI. Renal tumors                                                        |                                                                                                                                                                                                                                                 |
| (a.1) Nephroblastoma                                                    | 8959, 8960                                                                                                                                                                                                                                      |
| (b) Renal carcinomas                                                    | 8010-8041, 8050-8075, 8082, 8120-8122, 8130-8141, 8143, 8155, 8190-8201, 8210, 8211, 8221-8231, 8240, 8241, 8244-8246, 8260-8263, 8290, 8310, 8320, 8323, 8401, 8430, 8440, 8480-8490, 8504, 8510, 8550, 8560-8576, 8311, 8312, 8316-8319, 8361 |
| (c) Unspecified malignant renal tumors                                  | 8000-8005                                                                                                                                                                                                                                       |

|                                                                                |                                                                                                                                                                                                                                                                 |
|--------------------------------------------------------------------------------|-----------------------------------------------------------------------------------------------------------------------------------------------------------------------------------------------------------------------------------------------------------------|
| VII. Hepatic tumors                                                            |                                                                                                                                                                                                                                                                 |
| (a) Hepatoblastoma and mesenchymal tumors of the liver                         | 8970                                                                                                                                                                                                                                                            |
| (b) Hepatic carcinomas                                                         | 8010-8041, 8050-8075, 8082, 8120-8122, 8140, 8141, 8143, 8155, 8190-8201, 8210, 8211, 8230, 8231, 8240, 8241, 8244-8246, 8260-8264, 8310, 8320, 8323, 8401, 8430, 8440, 8480-8490, 8504, 8510, 8550, 8560-8576, 8160-8180                                       |
| (c) Unspecified malignant hepatic tumors                                       | 8000-8005                                                                                                                                                                                                                                                       |
| VIII. Malignant bone tumors                                                    |                                                                                                                                                                                                                                                                 |
| (a) Osteosarcomas                                                              | 9180-9187, 9191-9195, 9200                                                                                                                                                                                                                                      |
| (b) Chondrosarcomas                                                            | 9210-9213, 9220-9222, 9230, 9231, 9240-9243                                                                                                                                                                                                                     |
| (c) Ewing tumor and related sarcomas of bone                                   | 9260, 9364, 9365                                                                                                                                                                                                                                                |
| (d) Other specified malignant bone tumors                                      | 8810, 8811, 8823, 8830, 8812, 9250, 9261, 9262, 9270-9275, 9280-9282, 9290, 9300-9302, 9310-9312, 9320-9322, 9330, 9340-9342, 9370-9372                                                                                                                         |
| (e) Unspecified malignant bone tumors                                          | 8000-8005, 8800, 8801, 8803-8805                                                                                                                                                                                                                                |
| IX. Soft tissue and other extrasosseous sarcomas                               |                                                                                                                                                                                                                                                                 |
| (a) Rhabdomyosarcomas                                                          | 8900-8905, 8910, 8912, 8920, 8991                                                                                                                                                                                                                               |
| (b) Fibrosarcomas, peripheral nerve sheath tumors, and other fibrous neoplasms | 8810, 8811, 8813-8815, 8821, 8823, 8834-8835, 8820, 8822, 8824-8827, 9150, 9160, 9540-9571, 9491, 9580                                                                                                                                                          |
| (c) Kaposi sarcoma                                                             | 9140                                                                                                                                                                                                                                                            |
| (d.1) Ewing tumor and Askin tumor of soft tissue                               | 9260, 9365                                                                                                                                                                                                                                                      |
| (d.2) Peripheral neuroectodermal tumor (pPNET) of soft tissue                  | 9364                                                                                                                                                                                                                                                            |
| (e) Other and unspecified malignant gonadal tumors                             | 8800-8805                                                                                                                                                                                                                                                       |
| X. Germ cell tumors, trophoblastic tumors, and neoplasms of gonads             |                                                                                                                                                                                                                                                                 |
| (a) Intracranial and intraspinal germ cell tumors                              | 9060-9065, 9070-9072, 9080-9085, 9100-9101 (C700-C729, C751-C753)                                                                                                                                                                                               |
| (b) Malignant extracranial and extragonadal germ cell tumors                   | 9060-9065, 9070-9072, 9080-9085, 9100-9105 (C000-C559, C570-C619, C630-C699, C739-C750, C754-C768, C809)                                                                                                                                                        |
| (c) Malignant gonadal germ cell tumors                                         | 9060-9065, 9070-9073, 9080-9085, 9090, 9091, 9100, 9101 (C569, C620-C629)                                                                                                                                                                                       |
| (d) Gonadal carcinomas                                                         | 8010-8041, 8050-8075, 8082, 8120-8122, 8130-8141, 8143, 8190-8201, 8210, 8211, 8221-8241, 8244-8246, 8260-8263, 8290, 8310, 8313, 8320, 8323, 8380-8384, 8430, 8440, 8480-8490, 8504, 8510, 8550, 8560-8573, 9000, 9014, 9015, 8441-8444, 8450, 8451, 8460-8473 |
| (e) Other and unspecified malignant gonadal tumors                             | 8590-8671, 8000-8005                                                                                                                                                                                                                                            |
| XI. Other malignant epithelial neoplasms and malignant melanomas               |                                                                                                                                                                                                                                                                 |
| (a) Adrenocortical carcinomas                                                  | 8370-8375                                                                                                                                                                                                                                                       |
| (b) Thyroid carcinomas                                                         | 8010-8041, 8050-8075, 8082, 8120-8122, 8130-8141, 8190, 8200, 8201, 8211, 8230, 8231, 8244-8246, 8260-8263, 8290, 8310, 8320, 8323, 8430, 8440, 8480, 8481, 8510, 8560-8573, 8330-8337, 8340-8347, 8350                                                         |
| (c) Nasopharyngeal carcinomas                                                  | 8010-8041, 8050-8075, 8082, 8083, 8120-8122, 8130-8141, 8190, 8200, 8201, 8211, 8230, 8231, 8244-8246, 8260-8263, 8290, 8310, 8320, 8323, 8430, 8440, 8480, 8481, 8500-8576                                                                                     |
| (d) Malignant melanomas                                                        | 8720-8780, 8790                                                                                                                                                                                                                                                 |
| (e) Skin carcinomas                                                            | 8010-8041, 8050-8075, 8078, 8082, 8090-8110, 8140, 8143, 8147, 8190, 8200, 8240, 8246, 8247, 8260, 8310, 8320, 8323, 8390-8420, 8430, 8480, 8542, 8560, 8570-8573, 8940, 8941                                                                                   |
| (f) Other and unspecified carcinomas                                           | 8010-8084, 8120-8157, 8190-8264, 8290, 8310, 8313-8315, 8320-8325, 8360, 8380-8384, 8430-8440, 8452-8454, 8480-8586, 8588-8589, 8940, 8941, 8983, 9000, 9010-9016, 9020, 9030                                                                                   |
| XII. Other and unspecified malignant neoplasms                                 |                                                                                                                                                                                                                                                                 |

|                                        |                                                         |
|----------------------------------------|---------------------------------------------------------|
| (a) Other specified malignant tumors   | 8930-8936, 8950, 8951, 8971-8981, 9050-9055, 9110, 9363 |
| (b) Other unspecified malignant tumors | 8000-8005                                               |

**Supplementary Table 2. Annual percentage changes (APCs) and 95% confidence intervals (95% CIs) by malignant tumor histology type overall and sex among children and adolescents aged 0-19 at diagnosis stratified by tumor type, SEER 22 (2000-2019)**

| ICCC3                                                             | Year of diagnosis | Overall Count | Overall IR | Overall APC | Overall APC CI | Male Count | Male IR | Male APC | Male APC CI  | Female Count | Female IR | Female APC | Female APC CI |
|-------------------------------------------------------------------|-------------------|---------------|------------|-------------|----------------|------------|---------|----------|--------------|--------------|-----------|------------|---------------|
| Overall                                                           | 2000-2019         | 148888        | 18.4       | .8          | (0.6 - 1.1)    | 79597      | 19.2    | .8       | (0.5 - 1)    | 69291        | 17.5      | .9         | (0.7 - 1.2)   |
| I LEUKEMIAS, MYELOPROLIFERATIVE AND MYELODYSPLASTIC DISEASES      | 2000-2019         | 39756         | 4.9        | .6          | (0.3 - 0.9)    | 22204      | 5.4     | .7       | (0.4 - 1.1)  | 17552        | 4.5       | .5         | (0.1 - 0.8)   |
| Ia Lymphoid leukemias                                             | 2000-2019         | 28686         | 3.6        | .6          | (0.3 - 0.8)    | 16295      | 4.0     | .7       | (0.4 - 1)    | 12391        | 3.1       | .4         | (0 - 0.7)     |
| Ib Acute myeloid leukemias                                        | 2000-2019         | 6768          | .8         | .6          | (0.2 - 1)      | 3544       | .9      | .5       | (-0.2 - 1.1) | 3224         | .8        | .7         | (0.1 - 1.3)   |
| Ic Chronic myeloproliferative diseases                            | 2000-2019         | 2108          | .3         | 1.2         | (-0.4 - 2.7)   | 1124       | .3      | 1.8      | (0.1 - 3.6)  | 984          | .2        | .4         | (-1.3 - 2.1)  |
| Id Myelodysplastic syndrome and other myeloproliferative diseases | 2000-2019         | 1181          | .1         | -.3         | (-2.3 - 1.8)   | 664        | .2      | -.1      | (-2.6 - 2.6) | 517          | .1        | -.6        | (-2.4 - 1.2)  |
| Ie Unspecified and other specified leukemias                      | 2000-2019         | 1013          | .1         | 1.0         | (-0.1 - 2.1)   | 577        | .1      | .9       | (-0.7 - 2.5) | 436          | .1        | 1.1        | (-0.5 - 2.9)  |
| II LYMPHOMAS AND RETICULOENDOTHELIAL NEOPLASMS                    | 2000-2019         | 22728         | 2.8        | 1.7         | (1.2 - 2.2)    | 13590      | 3.3     | 1.9      | (1.4 - 2.4)  | 9138         | 2.3       | 1.5        | (0.9 - 2.2)   |
| Ila Hodgkin lymphomas                                             | 2000-2019         | 9997          | 1.2        | .1          | (-0.2 - 0.4)   | 5384       | 1.3     | .1       | (-0.4 - 0.5) | 4613         | 1.2       | .0         | (-0.5 - 0.6)  |
| Ilb Non-Hodgkin lymphomas (except Burkitt lymphoma)               | 2000-2019         | 7897          | 1.0        | 1.7         | (1 - 2.4)      | 4927       | 1.2     | 1.7      | (1.1 - 2.4)  | 2970         | .8        | 1.7        | (0.8 - 2.7)   |
| Ilc Burkitt lymphoma                                              | 2000-2019         | 1942          | .2         | -.5         | (-1.3 - 0.2)   | 1568       | .4      | -.5      | (-1.4 - 0.4) | 374          | .1        | -.1        | (-2.3 - 2.1)  |
| Ild Miscellaneous lymphoreticular neoplasms                       | 2000-2019         | 2594          | .3         | 11.1        | (6.7 - 15.6)   | 1536       | .4      | 12.2     | (7.9 - 16.6) | 1058         | .3        | 9.5        | (4.7 - 14.5)  |
| Ile Unspecified lymphomas                                         | 2000-2019         | 298           | .0         | -.7         | (-3 - 1.6)     | 175        | .0      | 1.3      | (-1.2 - 3.8) | 123          | .0        | -3.2       | (-6.5 - 0.3)  |
| III CNS AND MISCELLANEOUS INTRACRANIAL AND INTRASPINAL NEOPLASMS  | 2000-2019         | 25217         | 3.1        | .1          | (-0.3 - 0.5)   | 13506      | 3.3     | .1       | (-0.3 - 0.5) | 11711        | 3.0       | .1         | (-0.5 - 0.6)  |
| IIIa1 Ependymomas                                                 | 2000-2019         | 2005          | .2         | .3          | (-0.8 - 1.3)   | 1088       | .3      | .5       | (-0.7 - 1.6) | 917          | .2        | .0         | (-1.3 - 1.4)  |
| IIIb Astrocytomas                                                 | 2000-2019         | 12801         | 1.6        | .2          | (-0.4 - 0.8)   | 6663       | 1.6     | .2       | (-0.4 - 0.8) | 6138         | 1.6       | .2         | (-0.6 - 1)    |

|                                                              |           |      |    |      |               |      |     |      |               |      |    |      |               |
|--------------------------------------------------------------|-----------|------|----|------|---------------|------|-----|------|---------------|------|----|------|---------------|
| IIIc1 Medulloblastomas                                       | 2000-2019 | 3228 | .4 | .2   | (-0.3 - 0.7)  | 2044 | .5  | .4   | (-0.1 - 0.9)  | 1184 | .3 | -.2  | (-1.2 - 0.9)  |
| IIIc2 Primitive neuroectodermal tumor (PNET)                 | 2000-2019 | 935  | .1 | -7.1 | (-8.9 - -5.2) | 500  | .1  | -7.5 | (-9.3 - -5.6) | 435  | .1 | -6.6 | (-8.9 - -4.3) |
| IIIc3/c4 Medulloepithelioma/Atypical teratoid/rhabdoid tumor | 2000-2019 | 725  | .1 | 3.4  | (1.4 - 5.6)   | 385  | .1  | 2.6  | (0.1 - 5.2)   | 340  | .1 | 4.1  | (1.2 - 7.1)   |
| IIIId Other gliomas                                          | 2000-2019 | 4485 | .6 | .7   | (0 - 1.3)     | 2256 | .5  | .5   | (-0.2 - 1.2)  | 2229 | .6 | .9   | (-0.2 - 1.9)  |
| IIIe Other specified intracranial and intraspinal neoplasms  | 2000-2019 | 518  | .1 | .4   | (-1.1 - 2)    | 286  | .1  | .4   | (-1.7 - 2.5)  | 232  | .1 | .4   | (-2 - 2.8)    |
| IIIf Unspecified intracranial and intraspinal neoplasms      | 2000-2019 | 338  | .0 | .8   | (-0.9 - 2.5)  | 179  | .0  | .8   | (-1.4 - 3.2)  | 159  | .0 | .3   | (-2.4 - 3)    |
| IV NEUROBLASTOMA AND OTHER PERIPHERAL NERVOUS CELL TUMORS    | 2000-2019 | 6690 | .8 | .0   | (-0.6 - 0.6)  | 3550 | .9  | .1   | (-0.8 - 0.9)  | 3140 | .8 | -.1  | (-0.8 - 0.7)  |
| IVa Neuroblastoma and ganglioneuroblastoma                   | 2000-2019 | 6480 | .8 | .0   | (-0.6 - 0.6)  | 3443 | .8  | .1   | (-0.7 - 0.9)  | 3037 | .8 | -.1  | (-0.9 - 0.7)  |
| IVb Other peripheral nervous cell tumors                     | 2000-2019 | 210  | .0 | -.3  | (-3.1 - 2.7)  | 107  | .0  | -1.4 | (-5.9 - 3.2)  | 103  | .0 | .8   | (-1.4 - 3)    |
| V RETINOBLASTOMA                                             | 2000-2019 | 2686 | .3 | -.2  | (-0.7 - 0.3)  | 1358 | .3  | -.9  | (-1.8 - 0)    | 1328 | .3 | .6   | (-0.3 - 1.6)  |
| VI RENAL TUMORS                                              | 2000-2019 | 5336 | .7 | .2   | (-0.3 - 0.7)  | 2519 | .6  | .0   | (-0.6 - 0.6)  | 2817 | .7 | .4   | (-0.4 - 1.1)  |
| VIa1 Nephroblastoma                                          | 2000-2019 | 4497 | .6 | .0   | (-0.5 - 0.6)  | 2081 | .5  | .0   | (-0.7 - 0.8)  | 2416 | .6 | .0   | (-0.7 - 0.8)  |
| VIb Renal carcinomas                                         | 2000-2019 | 524  | .1 | 1.8  | (0.1 - 3.6)   | 262  | .1  | 1.2  | (-0.6 - 3.2)  | 262  | .1 | 2.1  | (-0.4 - 4.6)  |
| VIc Unspecified malignant renal tumors                       | 2000-2019 | 23   | .0 | .    | (. - .)       | 9    | .0  | .    | (. - .)       | 14   | .0 | .    | (. - .)       |
| VII HEPATIC TUMORS                                           | 2000-2019 | 2156 | .3 | 1.9  | (1 - 2.9)     | 1246 | .3  | 1.9  | (0.8 - 3)     | 910  | .2 | 2.0  | (0.5 - 3.4)   |
| VIIa Hepatoblastoma and mesenchymal tumors of liver          | 2000-2019 | 1654 | .2 | 2.3  | (1.2 - 3.4)   | 974  | .2  | 2.2  | (1 - 3.5)     | 680  | .2 | 2.3  | (0.6 - 4)     |
| VIIb Hepatic carcinomas                                      | 2000-2019 | 484  | .1 | .5   | (-0.8 - 1.9)  | 260  | .1  | .6   | (-1.2 - 2.4)  | 224  | .1 | .3   | (-1.8 - 2.4)  |
| VIIc Unspecified malignant hepatic tumors                    | 2000-2019 | 18   | .0 | .    | (. - .)       | 12   | .0  | .    | (. - .)       | 6    | .0 | .    | (. - .)       |
| VIII MALIGNANT BONE TUMORS                                   | 2000-2019 | 7501 | .9 | .4   | (0 - 0.8)     | 4280 | 1.0 | .6   | (0 - 1.3)     | 3221 | .8 | .1   | (-0.4 - 0.6)  |
| VIIIa Osteosarcomas                                          | 2000-2019 | 4276 | .5 | .4   | (0 - 0.7)     | 2431 | .6  | .9   | (0.4 - 1.4)   | 1845 | .5 | -.4  | (-1.1 - 0.3)  |

|                                                                             |           |      |     |      |              |      |     |      |              |      |     |      |               |
|-----------------------------------------------------------------------------|-----------|------|-----|------|--------------|------|-----|------|--------------|------|-----|------|---------------|
| VIIIb Chondrosarcomas                                                       | 2000-2019 | 302  | .0  | -1.4 | (-4.1 - 1.2) | 185  | .0  | -1.4 | (-4.2 - 1.4) | 117  | .0  | -1.6 | (-5.5 - 2.5)  |
| VIIIc Ewing tumor and related sarcomas of bone                              | 2000-2019 | 2363 | .3  | .5   | (-0.3 - 1.3) | 1373 | .3  | .4   | (-0.9 - 1.6) | 990  | .3  | .6   | (-0.3 - 1.5)  |
| VIII d Other specified malignant bone tumors                                | 2000-2019 | 389  | .0  | 1.4  | (-0.6 - 3.3) | 190  | .0  | 1.3  | (-1 - 3.5)   | 199  | .1  | 1.4  | (-1 - 3.8)    |
| VIIIe Unspecified malignant bone tumors                                     | 2000-2019 | 171  | .0  | .6   | (-1.7 - 2.9) | 101  | .0  | -.7  | (-3.3 - 2.1) | 70   | .0  | .    | (. - .)       |
| IX SOFT TISSUE AND OTHER EXTRAOSSEOUS SARCOMAS                              | 2000-2019 | 9878 | 1.2 | .1   | (-0.1 - 0.4) | 5444 | 1.3 | .0   | (-0.4 - 0.4) | 4434 | 1.1 | .3   | (-0.1 - 0.8)  |
| IXa Rhabdomyosarcomas                                                       | 2000-2019 | 3676 | .5  | -.2  | (-0.7 - 0.4) | 2112 | .5  | -.4  | (-1.1 - 0.4) | 1564 | .4  | .1   | (-0.8 - 1)    |
| IXb Fibrosarcomas, peripheral nerve sheath tumors and oth fibrous neoplasms | 2000-2019 | 1020 | .1  | -1.2 | (-2.6 - 0.2) | 558  | .1  | -.6  | (-2.5 - 1.2) | 462  | .1  | -1.9 | (-3.3 - -0.5) |
| IXc Kaposi sarcoma                                                          | 2000-2019 | 39   | .0  | .    | (. - .)      | 35   | .0  | .    | (. - .)      | 4    | .0  | .    | (. - .)       |
| IXd1 Ewing tumor and Askin tumor of soft tissue                             | 2000-2019 | 532  | .1  | 1.9  | (0.4 - 3.4)  | 296  | .1  | 1.6  | (-0.6 - 4)   | 236  | .1  | 2.5  | (0.2 - 4.9)   |
| IXd2 Peripheral neuroectodermal tumor (pPNET) of soft tissue                | 2000-2019 | 280  | .0  | -1.9 | (-4.2 - 0.5) | 156  | .0  | -.7  | (-3.4 - 2.1) | 124  | .0  | -3.4 | (-6.7 - 0.1)  |
| IXe Unspecified soft tissue sarcomas                                        | 2000-2019 | 1154 | .1  | 2.0  | (0.6 - 3.3)  | 629  | .2  | 1.8  | (0.2 - 3.4)  | 525  | .1  | 2.2  | (0.2 - 4.2)   |
| X GERM CELL TUMORS, TROPHOBLASTIC TUMORS AND NEOPLASMS OF GONADS            | 2000-2019 | 9825 | 1.2 | .6   | (0.1 - 1.1)  | 6205 | 1.5 | .8   | (0.1 - 1.4)  | 3620 | .9  | .4   | (-0.1 - 0.9)  |
| Xa Intracranial and intraspinal germ cell tumors                            | 2000-2019 | 1507 | .2  | .9   | (0 - 1.8)    | 1106 | .3  | .9   | (-0.1 - 1.9) | 401  | .1  | .9   | (-1 - 2.8)    |
| Xb Malignant extracranial and extragonadal germ cell tumors                 | 2000-2019 | 1257 | .2  | -.8  | (-1.8 - 0.2) | 572  | .1  | -.7  | (-1.9 - 0.6) | 685  | .2  | -.9  | (-2.1 - 0.4)  |
| Xc Malignant gonadal germ cell tumors                                       | 2000-2019 | 6421 | .8  | .6   | (0 - 1.2)    | 4439 | 1.1 | .8   | (0.1 - 1.6)  | 1982 | .5  | .2   | (-0.3 - 0.8)  |
| Xd Gonadal carcinomas                                                       | 2000-2019 | 364  | .0  | 1.2  | (-0.9 - 3.3) | 31   | .0  | .    | (. - .)      | 333  | .1  | 1.4  | (-0.8 - 3.8)  |
| Xe Other and unspecified malignant gonadal tumors                           | 2000-2019 | 276  | .0  | 3.7  | (1.6 - 5.7)  | 57   | .0  | .    | (. - .)      | 219  | .1  | 2.9  | (1 - 4.8)     |

|                                                                 |           |       |     |      |               |      |     |      |               |       |     |      |               |
|-----------------------------------------------------------------|-----------|-------|-----|------|---------------|------|-----|------|---------------|-------|-----|------|---------------|
| XI OTHER MALIGNANT EPITHELIAL NEOPLASMS AND MALIGNANT MELANOMAS | 2000-2019 | 16244 | 2.0 | 2.8  | (2.3 - 3.3)   | 5321 | 1.3 | 2.0  | (1.2 - 2.8)   | 10923 | 2.7 | 3.2  | (2.6 - 3.7)   |
| XIa Adrenocortical carcinomas                                   | 2000-2019 | 174   | .0  | -.1  | (-3.3 - 3.2)  | 66   | .0  | .4   | (-4.4 - 5.4)  | 108   | .0  | -.1  | (-3.3 - 3.1)  |
| XIb Thyroid carcinomas                                          | 2000-2019 | 7317  | .9  | 4.3  | (3.6 - 5)     | 1398 | .3  | 4.3  | (3.1 - 5.4)   | 5919  | 1.5 | 4.3  | (3.5 - 5.1)   |
| XIc Nasopharyngeal carcinomas                                   | 2000-2019 | 417   | .1  | -.8  | (-2.5 - 0.9)  | 276  | .1  | -1.3 | (-3.6 - 1.2)  | 141   | .0  | .2   | (-1.9 - 2.4)  |
| XId Malignant melanomas                                         | 2000-2019 | 3628  | .4  | -3.4 | (-4.3 - -2.5) | 1538 | .4  | -3.9 | (-5.1 - -2.7) | 2090  | .5  | -3.1 | (-4.2 - -1.9) |
| XIe Skin carcinomas                                             | 2000-2019 | 80    | .0  | 4.3  | (-0.3 - 9.1)  | 39   | .0  | .    | (. - .)       | 41    | .0  | .    | (. - .)       |
| XIf Other and unspecified carcinomas                            | 2000-2019 | 4628  | .6  | 5.8  | (4.5 - 7.1)   | 2004 | .5  | 5.5  | (4.1 - 6.9)   | 2624  | .7  | 6.0  | (4.5 - 7.5)   |
| XII OTHER AND UNSPECIFIED MALIGNANT NEOPLASMS                   | 2000-2019 | 708   | .1  | .6   | (-0.8 - 2)    | 299  | .1  | 1.5  | (-0.4 - 3.3)  | 409   | .1  | -.1  | (-2 - 1.7)    |
| XIIa Other specified malignant tumors                           | 2000-2019 | 373   | .0  | 2.1  | (-0.5 - 4.8)  | 161  | .0  | 2.2  | (-0.8 - 5.3)  | 212   | .1  | 1.8  | (-1.6 - 5.3)  |
| XIIb Other unspecified malignant tumors                         | 2000-2019 | 335   | .0  | -1.6 | (-3.5 - 0.4)  | 138  | .0  | .3   | (-2 - 2.6)    | 197   | .0  | -2.7 | (-5.3 - -0.1) |

**Supplementary Table 3. Annual percentage changes (APCs) and 95% confidence intervals (95% CIs) by malignant tumor histology type and race/ethnicity among children and adolescents aged 0-19 at diagnosis stratified by tumor type, SEER 22 (2000-2019)**

| ICCC3                                                             | Year of diagnosis | NHW Count | NHW IR | NHW APC | NHW APC CI    | NHB Count | NHB IR | NHB APC | NHB APC CI    | AIAN Count | AIAN IR | AIAN APC | AIAN APC CI  | API Count | API IR | API APC | API APC CI   | Hispanic Count | Hispanic IR | Hispanic APC | Hispanic APC CI |
|-------------------------------------------------------------------|-------------------|-----------|--------|---------|---------------|-----------|--------|---------|---------------|------------|---------|----------|--------------|-----------|--------|---------|--------------|----------------|-------------|--------------|-----------------|
| Overall                                                           | 2000-2019         | 76480     | 19.9   | .7      | (0.5 - 1)     | 15256     | 14.0   | .9      | (0.6 - 1.3)   | 906        | 15.6    | 1.7      | (0.5 - 2.8)  | 9429      | 15.9   | 1.4     | (0.7 - 2)    | 45208          | 18.1        | 1.0          | (0.7 - 1.2)     |
| I LEUKEMIAS, MYELOPROLIFERATIVE AND MYELODYSPLASTIC DISEASES      | 2000-2019         | 17792     | 4.7    | .1      | (-0.2 - 0.5)  | 3344      | 3.1    | 1.0     | (0.1 - 1.8)   | 291        | 5.1     | 1.2      | (-0.4 - 2.9) | 2783      | 4.7    | .6      | (-0.3 - 1.5) | 15228          | 6.0         | .7           | (0.3 - 1)       |
| Ia Lymphoid leukemias                                             | 2000-2019         | 12916     | 3.4    | .1      | (-0.3 - 0.5)  | 1966      | 1.8    | .6      | (-0.4 - 1.7)  | 199        | 3.5     | 1.7      | (-0.2 - 3.7) | 1891      | 3.2    | .3      | (-0.7 - 1.2) | 11496          | 4.5         | .7           | (0.3 - 1.1)     |
| Ib Acute myeloid leukemias                                        | 2000-2019         | 3018      | .8     | .0      | (-0.6 - 0.6)  | 833       | .8     | .9      | (-0.8 - 2.6)  | 57         | 1.0     | .        | (. - .)      | 578       | 1.0    | 2.2     | (0.8 - 3.8)  | 2242           | .9          | .6           | (0 - 1.2)       |
| Ic Chronic myeloproliferative diseases                            | 2000-2019         | 947       | .2     | 1.2     | (-0.8 - 3.3)  | 301       | .3     | 3.3     | (0.9 - 5.8)   | 18         | .3      | .        | (. - .)      | 156       | .3     | .0      | (-2.4 - 2.5) | 654            | .3          | .1           | (-2 - 2.2)      |
| Id Myelodysplastic syndrome and other myeloproliferative diseases | 2000-2019         | 516       | .1     | -1.2    | (-3.7 - 1.3)  | 136       | .1     | .       | (. - .)       | 11         | .2      | .        | (. - .)      | 100       | .2     | .       | (. - .)      | 406            | .2          | .4           | (-1.9 - 2.7)    |
| Ie Unspecified and other specified leukemias                      | 2000-2019         | 395       | .1     | .4      | (-1.7 - 2.6)  | 108       | .1     | 1.6     | (-1.4 - 4.6)  | 6          | .1      | .        | (. - .)      | 58        | .1     | .       | (. - .)      | 430            | .2          | 1.1          | (-0.3 - 2.6)    |
| II LYMPHOMAS AND RETICULOENDOTHELIAL NEOPLASMS                    | 2000-2019         | 12111     | 3.1    | 1.8     | (1.3 - 2.4)   | 2606      | 2.4    | 1.5     | (0.7 - 2.3)   | 108        | 1.8     | 2.6      | (-1 - 6.3)   | 1446      | 2.5    | 2.8     | (1.9 - 3.7)  | 6200           | 2.5         | 1.7          | (1.1 - 2.3)     |
| Ila Hodgkin lymphomas                                             | 2000-2019         | 5731      | 1.4    | .3      | (-0.1 - 0.8)  | 1139      | 1.0    | .5      | (-0.6 - 1.7)  | 34         | .6      | .        | (. - .)      | 505       | .9     | 1.4     | (0 - 2.8)    | 2501           | 1.0         | -.4          | (-1 - 0.2)      |
| Ilb Non-Hodgkin lymphomas (except Burkitt lymphoma)               | 2000-2019         | 3862      | 1.0    | 1.6     | (0.7 - 2.5)   | 1113      | 1.0    | 2.0     | (0.5 - 3.6)   | 37         | .6      | .        | (. - .)      | 602       | 1.0    | 2.3     | (0.2 - 4.4)  | 2176           | .9          | 1.7          | (0.9 - 2.5)     |
| Ilc Burkitt lymphoma                                              | 2000-2019         | 1175      | .3     | -.1     | (-1.1 - 1)    | 173       | .2     | -.9     | (-4.2 - 2.4)  | 12         | .2      | .        | (. - .)      | 141       | .2     | 1.3     | (-1.6 - 4.2) | 422            | .2          | -1.5         | (-3.2 - 0.2)    |
| Ild Miscellaneous lymphoreticular neoplasms                       | 2000-2019         | 1216      | .3     | 11.7    | (6.8 - 16.9)  | 138       | .1     | 7.6     | (3.7 - 11.6)  | 22         | .4      | .        | (. - .)      | 184       | .3     | .       | (. - .)      | 993            | .4          | 10.2         | (6 - 14.5)      |
| Ile Unspecified lymphomas                                         | 2000-2019         | 127       | .0     | -1.1    | (-3.9 - 1.8)  | 43        | .0     | .       | (. - .)       | 3          | .1      | .        | (. - .)      | 14        | .0     | .       | (. - .)      | 108            | .0          | -1.0         | (-4.9 - 2.9)    |
| III CNS AND MISCELLANEOUS INTRACRANIAL AND INTRASPINAL NEOPLASMS  | 2000-2019         | 14326     | 3.8    | .4      | (-0.1 - 0.9)  | 2730      | 2.5    | .9      | (0.1 - 1.7)   | 132        | 2.3     | 2.6      | (-0.2 - 5.5) | 1366      | 2.3    | .5      | (-0.7 - 1.7) | 6409           | 2.5         | -.4          | (-0.8 - 0.1)    |
| IIla1 Ependymomas                                                 | 2000-2019         | 1019      | .3     | .8      | (-0.5 - 2.1)  | 219       | .2     | 1.1     | (-1.5 - 3.8)  | 6          | .1      | .        | (. - .)      | 114       | .2     | .8      | (-2.7 - 4.4) | 633            | .2          | -1.0         | (-2.2 - 0.3)    |
| IIlb Astrocytomas                                                 | 2000-2019         | 7655      | 2.0    | .5      | (-0.1 - 1.2)  | 1350      | 1.2    | 1.0     | (-0.2 - 2.2)  | 73         | 1.3     | .        | (. - .)      | 628       | 1.1    | .7      | (-1.1 - 2.4) | 2943           | 1.2         | -.2          | (-1.1 - 0.6)    |
| IIlc1 Medulloblastomas                                            | 2000-2019         | 1771      | .5     | .5      | (-0.3 - 1.3)  | 274       | .3     | 1.0     | (-0.4 - 2.3)  | 16         | .3      | .        | (. - .)      | 216       | .4     | 1.9     | (-0.1 - 3.9) | 931            | .4          | -.9          | (-1.8 - 0.1)    |
| IIlc2 Primitive neuroectodermal tumor (PNET)                      | 2000-2019         | 484       | .1     | -6.8    | (-9.2 - -4.3) | 107       | .1     | -5.0    | (-7.4 - -2.5) | 3          | .1      | .        | (. - .)      | 65        | .1     | .       | (. - .)      | 269            | .1          | -7.9         | (-10 - -5.7)    |



|                                                              |           |      |     |      |              |     |    |      |              |    |    |   |         |     |    |     |              |      |    |     |              |
|--------------------------------------------------------------|-----------|------|-----|------|--------------|-----|----|------|--------------|----|----|---|---------|-----|----|-----|--------------|------|----|-----|--------------|
| IIIc3/c4 Medulloepithelioma/Atypical teratoid/rhabdoid tumor | 2000-2019 | 358  | .1  | 2.8  | (-0.1 - 5.7) | 77  | .1 | .    | (. - .)      | 5  | .1 | . | (. - .) | 56  | .1 | .   | (. - .)      | 223  | .1 | 4.3 | (1.6 - 7.1)  |
| IIIId Other gliomas                                          | 2000-2019 | 2521 | .7  | .9   | (0 - 1.7)    | 531 | .5 | 1.2  | (-0.4 - 2.9) | 23 | .4 | . | (. - .) | 241 | .4 | -.4 | (-2.9 - 2.2) | 1124 | .4 | .7  | (-0.8 - 2.2) |
| IIIe Other specified intracranial and intraspinal neoplasms  | 2000-2019 | 250  | .1  | .4   | (-2 - 2.8)   | 107 | .1 | -.3  | (-3.5 - 3)   | 4  | .1 | . | (. - .) | 19  | .0 | .   | (. - .)      | 133  | .1 | 1.4 | (-1.8 - 4.7) |
| IIIIf Unspecified intracranial and intraspinal neoplasms     | 2000-2019 | 178  | .0  | .5   | (-2.2 - 3.4) | 45  | .0 | 1.9  | (-3.1 - 7.2) | 1  | .0 | . | (. - .) | 14  | .0 | .   | (. - .)      | 97   | .0 | 1.0 | (-2.4 - 4.5) |
| IV NEUROBLASTOMA AND OTHER PERIPHERAL NERVOUS CELL TUMORS    | 2000-2019 | 3869 | 1.0 | -.1  | (-0.7 - 0.6) | 775 | .7 | .4   | (-1.5 - 2.3) | 36 | .6 | . | (. - .) | 416 | .7 | 1.1 | (-0.4 - 2.7) | 1527 | .6 | .4  | (-0.6 - 1.4) |
| IVa Neuroblastoma and ganglioneuroblastoma                   | 2000-2019 | 3748 | 1.0 | -.1  | (-0.7 - 0.6) | 746 | .7 | .3   | (-1.6 - 2.3) | 34 | .6 | . | (. - .) | 407 | .7 | 1.2 | (-0.4 - 2.9) | 1478 | .6 | .4  | (-0.7 - 1.5) |
| IVb Other peripheral nervous cell tumors                     | 2000-2019 | 121  | .0  | .7   | (-3 - 4.4)   | 29  | .0 | .    | (. - .)      | 2  | .0 | . | (. - .) | 9   | .0 | .   | (. - .)      | 49   | .0 | .   | (. - .)      |
| V RETINOBLASTOMA                                             | 2000-2019 | 1115 | .3  | .4   | (-0.7 - 1.5) | 378 | .4 | -1.2 | (-2.6 - 0.1) | 21 | .4 | . | (. - .) | 209 | .3 | -.1 | (-1.9 - 1.8) | 935  | .3 | -.7 | (-1.6 - 0.2) |
| VI RENAL TUMORS                                              | 2000-2019 | 2663 | .7  | .2   | (-0.5 - 1)   | 924 | .9 | .3   | (-1.1 - 1.7) | 41 | .7 | . | (. - .) | 223 | .4 | 1.1 | (-1.4 - 3.6) | 1429 | .5 | .7  | (-0.6 - 2)   |
| VIa1 Nephroblastoma                                          | 2000-2019 | 2266 | .6  | .2   | (-0.6 - 1)   | 777 | .7 | .4   | (-1 - 1.8)   | 32 | .6 | . | (. - .) | 173 | .3 | .1  | (-2.5 - 2.8) | 1205 | .5 | .4  | (-0.9 - 1.6) |
| VIb Renal carcinomas                                         | 2000-2019 | 255  | .1  | 1.5  | (-0.5 - 3.4) | 114 | .1 | .    | (. - .)      | 4  | .1 | . | (. - .) | 29  | .0 | .   | (. - .)      | 113  | .0 | .   | (. - .)      |
| VIc Unspecified malignant renal tumors                       | 2000-2019 | 9    | .0  | .    | (. - .)      | 2   | .0 | .    | (. - .)      | 1  | .0 | . | (. - .) | 2   | .0 | .   | (. - .)      | 8    | .0 | .   | (. - .)      |
| VII HEPATIC TUMORS                                           | 2000-2019 | 938  | .2  | 1.7  | (0.7 - 2.7)  | 219 | .2 | 2.7  | (0.2 - 5.3)  | 18 | .3 | . | (. - .) | 208 | .3 | -.6 | (-3.9 - 2.8) | 751  | .3 | 2.3 | (0.6 - 4.1)  |
| VIIa Hepatoblastoma and mesenchymal tumors of liver          | 2000-2019 | 706  | .2  | 1.7  | (0.4 - 3.1)  | 154 | .1 | 3.7  | (0.3 - 7.2)  | 15 | .3 | . | (. - .) | 161 | .3 | .4  | (-2.9 - 3.9) | 605  | .2 | 2.6 | (0.7 - 4.5)  |
| VIIb Hepatic carcinomas                                      | 2000-2019 | 223  | .1  | 1.1  | (-0.7 - 3)   | 63  | .1 | -.2  | (-3.9 - 3.6) | 3  | .1 | . | (. - .) | 46  | .1 | .   | (. - .)      | 141  | .1 | .7  | (-2.6 - 4.2) |
| VIIc Unspecified malignant hepatic tumors                    | 2000-2019 | 9    | .0  | .    | (. - .)      | 2   | .0 | .    | (. - .)      | 0  | .0 | . | (. - .) | 1   | .0 | .   | (. - .)      | 5    | .0 | .   | (. - .)      |
| VIII MALIGNANT BONE TUMORS                                   | 2000-2019 | 3877 | 1.0 | .5   | (0.1 - 1)    | 859 | .8 | .1   | (-1.2 - 1.3) | 42 | .7 | . | (. - .) | 491 | .8 | 1.4 | (0 - 2.9)    | 2188 | .9 | .2  | (-0.6 - 0.9) |
| VIIIa Osteosarcomas                                          | 2000-2019 | 1928 | .5  | .6   | (0 - 1.2)    | 680 | .6 | .2   | (-1 - 1.5)   | 21 | .4 | . | (. - .) | 285 | .5 | .4  | (-1.5 - 2.3) | 1341 | .6 | -.3 | (-1.1 - 0.6) |
| VIIIb Chondrosarcomas                                        | 2000-2019 | 178  | .0  | -1.4 | (-4.4 - 1.6) | 34  | .0 | .    | (. - .)      | 1  | .0 | . | (. - .) | 13  | .0 | .   | (. - .)      | 74   | .0 | -.8 | (-3.8 - 2.4) |
| VIIIc Ewing tumor and related sarcomas of bone               | 2000-2019 | 1524 | .4  | .5   | (-0.3 - 1.3) | 72  | .1 | .    | (. - .)      | 15 | .3 | . | (. - .) | 147 | .3 | 2.2 | (-0.2 - 4.7) | 589  | .2 | 1.0 | (-0.6 - 2.6) |
| IIId Other specified malignant bone tumors                   | 2000-2019 | 184  | .0  | 1.0  | (-2.4 - 4.6) | 36  | .0 | .    | (. - .)      | 4  | .1 | . | (. - .) | 36  | .1 | .   | (. - .)      | 126  | .1 | .8  | (-1.8 - 3.5) |
| VIIIe Unspecified malignant bone tumors                      | 2000-2019 | 63   | .0  | .    | (. - .)      | 37  | .0 | .    | (. - .)      | 1  | .0 | . | (. - .) | 10  | .0 | .   | (. - .)      | 58   | .0 | .7  | (-2.3 - 3.9) |

|                                                                             |           |      |     |      |               |      |     |      |              |    |     |   |         |     |     |      |              |      |     |      |              |
|-----------------------------------------------------------------------------|-----------|------|-----|------|---------------|------|-----|------|--------------|----|-----|---|---------|-----|-----|------|--------------|------|-----|------|--------------|
| IX SOFT TISSUE AND OTHER EXTRAOSSEOUS SARCOMAS                              | 2000-2019 | 4853 | 1.3 | .0   | (-0.5 - 0.5)  | 1476 | 1.3 | .7   | (-0.3 - 1.7) | 62 | 1.1 | . | (. - .) | 544 | .9  | 1.8  | (0.2 - 3.5)  | 2829 | 1.1 | .0   | (-0.6 - 0.6) |
| IXa Rhabdomyosarcomas                                                       | 2000-2019 | 1836 | .5  | -.4  | (-1.3 - 0.5)  | 553  | .5  | .0   | (-1.7 - 1.6) | 26 | .5  | . | (. - .) | 203 | .3  | 1.9  | (-0.5 - 4.4) | 1041 | .4  | .1   | (-0.7 - 0.9) |
| IXb Fibrosarcomas, peripheral nerve sheath tumors and oth fibrous neoplasms | 2000-2019 | 495  | .1  | -.8  | (-2.5 - 0.9)  | 150  | .1  | -1.2 | (-4.4 - 2)   | 8  | .1  | . | (. - .) | 49  | .1  | .    | (. - .)      | 298  | .1  | -2.6 | (-5.1 - 0)   |
| IXc Kaposi sarcoma                                                          | 2000-2019 | 9    | .0  | .    | (. - .)       | 18   | .0  | .    | (. - .)      | 0  | .0  | . | (. - .) | 1   | .0  | .    | (. - .)      | 11   | .0  | .    | (. - .)      |
| IXd1 Ewing tumor and Askin tumor of soft tissue                             | 2000-2019 | 296  | .1  | 1.2  | (-0.9 - 3.3)  | 28   | .0  | .    | (. - .)      | 3  | .0  | . | (. - .) | 26  | .0  | .    | (. - .)      | 176  | .1  | 2.7  | (0.4 - 5.1)  |
| IXd2 Peripheral neuroectodermal tumor (pPNET) of soft tissue                | 2000-2019 | 155  | .0  | -1.5 | (-4.1 - 1.1)  | 18   | .0  | .    | (. - .)      | 2  | .0  | . | (. - .) | 16  | .0  | .    | (. - .)      | 84   | .0  | -1.9 | (-6 - 2.3)   |
| IXe Unspecified soft tissue sarcomas                                        | 2000-2019 | 575  | .1  | 2.6  | (0.3 - 4.8)   | 188  | .2  | 2.5  | (-0.5 - 5.5) | 3  | .0  | . | (. - .) | 69  | .1  | .    | (. - .)      | 304  | .1  | 1.3  | (-0.6 - 3.2) |
| X GERM CELL TUMORS, TROPHOBLASTIC TUMORS AND NEOPLASMS OF GONADS            | 2000-2019 | 4542 | 1.1 | -.2  | (-0.7 - 0.3)  | 739  | .7  | .6   | (-0.3 - 1.5) | 55 | .9  | . | (. - .) | 725 | 1.2 | .3   | (-0.9 - 1.5) | 3673 | 1.5 | 1.0  | (0.3 - 1.8)  |
| Xa Intracranial and intraspinal germ cell tumors                            | 2000-2019 | 699  | .2  | .4   | (-1.1 - 2)    | 139  | .1  | 3.9  | (1 - 6.9)    | 3  | .1  | . | (. - .) | 217 | .4  | -.5  | (-3.1 - 2.2) | 444  | .2  | .6   | (-0.8 - 2)   |
| Xb Malignant extracranial and extragonadal germ cell tumors                 | 2000-2019 | 544  | .1  | -.7  | (-2.6 - 1.1)  | 155  | .1  | -1.4 | (-3.2 - 0.4) | 6  | .1  | . | (. - .) | 124 | .2  | -1.2 | (-3.7 - 1.4) | 405  | .2  | -1.5 | (-3.1 - 0)   |
| Xc Malignant gonadal germ cell tumors                                       | 2000-2019 | 3003 | .7  | -.5  | (-1.2 - 0.1)  | 358  | .3  | .1   | (-1.2 - 1.5) | 43 | .7  | . | (. - .) | 340 | .6  | .6   | (-1.3 - 2.5) | 2621 | 1.1 | 1.5  | (0.5 - 2.4)  |
| Xd Gonadal carcinomas                                                       | 2000-2019 | 175  | .0  | 1.6  | (-0.9 - 4.1)  | 29   | .0  | .    | (. - .)      | 2  | .0  | . | (. - .) | 35  | .1  | .    | (. - .)      | 121  | .1  | .4   | (-3.1 - 4)   |
| Xe Other and unspecified malignant gonadal tumors                           | 2000-2019 | 121  | .0  | 4.7  | (1.6 - 7.9)   | 58   | .1  | .    | (. - .)      | 1  | .0  | . | (. - .) | 9   | .0  | .    | (. - .)      | 82   | .0  | .    | (. - .)      |
| XI OTHER MALIGNANT EPITHELIAL NEOPLASMS AND MALIGNANT MELANOMAS             | 2000-2019 | 9969 | 2.5 | 2.5  | (2 - 3)       | 1104 | 1.0 | 1.6  | (0.6 - 2.7)  | 94 | 1.5 | . | (. - .) | 959 | 1.6 | 4.0  | (2.8 - 5.3)  | 3772 | 1.6 | 5.0  | (4.3 - 5.7)  |
| XIa Adrenocortical carcinomas                                               | 2000-2019 | 95   | .0  | .0   | (-3.7 - 4)    | 10   | .0  | .    | (. - .)      | 3  | .1  | . | (. - .) | 9   | .0  | .    | (. - .)      | 56   | .0  | .    | (. - .)      |
| XIb Thyroid carcinomas                                                      | 2000-2019 | 4255 | 1.1 | 3.9  | (3.1 - 4.6)   | 330  | .3  | 4.3  | (2 - 6.6)    | 43 | .7  | . | (. - .) | 579 | 1.0 | 5.5  | (3.7 - 7.3)  | 2016 | .8  | 5.4  | (4.3 - 6.5)  |
| XIc Nasopharyngeal carcinomas                                               | 2000-2019 | 107  | .0  | -.5  | (-3.5 - 2.7)  | 163  | .1  | -2.3 | (-4.8 - 0.2) | 4  | .1  | . | (. - .) | 45  | .1  | .    | (. - .)      | 98   | .0  | .    | (. - .)      |
| XId Malignant melanomas                                                     | 2000-2019 | 2990 | .8  | -2.8 | (-3.8 - -1.8) | 48   | .0  | 4.7  | (0.3 - 9.3)  | 9  | .2  | . | (. - .) | 65  | .1  | .    | (. - .)      | 340  | .1  | -1.3 | (-3.2 - 0.6) |
| XIe Skin carcinomas                                                         | 2000-2019 | 39   | .0  | .    | (. - .)       | 11   | .0  | .    | (. - .)      | 0  | .0  | . | (. - .) | 4   | .0  | .    | (. - .)      | 22   | .0  | .    | (. - .)      |

|                                               |           |      |    |      |              |     |    |     |              |    |    |   |         |     |    |     |             |      |    |      |              |
|-----------------------------------------------|-----------|------|----|------|--------------|-----|----|-----|--------------|----|----|---|---------|-----|----|-----|-------------|------|----|------|--------------|
| XIf Other and unspecified carcinomas          | 2000-2019 | 2483 | .6 | 6.9  | (5.4 - 8.6)  | 542 | .5 | 1.0 | (-0.4 - 2.4) | 35 | .6 | . | (. - .) | 257 | .4 | 3.3 | (1.3 - 5.4) | 1240 | .5 | 6.7  | (5.2 - 8.3)  |
| XII OTHER AND UNSPECIFIED MALIGNANT NEOPLASMS | 2000-2019 | 347  | .1 | .3   | (-1.6 - 2.2) | 88  | .1 | .   | (. - .)      | 4  | .1 | . | (. - .) | 41  | .1 | .   | (. - .)     | 217  | .1 | .3   | (-2.6 - 3.2) |
| XIIa Other specified malignant tumors         | 2000-2019 | 188  | .0 | 1.0  | (-2 - 4)     | 53  | .0 | .   | (. - .)      | 3  | .1 | . | (. - .) | 24  | .0 | .   | (. - .)     | 103  | .0 | 4.7  | (0.4 - 9.3)  |
| XIIb Other unspecified malignant tumors       | 2000-2019 | 159  | .0 | -1.1 | (-3.7 - 1.5) | 35  | .0 | .   | (. - .)      | 1  | .0 | . | (. - .) | 17  | .0 | .   | (. - .)     | 114  | .0 | -3.9 | (-6.5 - 1.3) |

**Supplementary Table 4. Annual percentage changes (APCs) and 95% confidence intervals (95% CIs) by malignant tumor histology type and socioeconomic status (SES) quintile among children and adolescents aged 0-19 at diagnosis stratified by tumor type, SEER 22 (2000-2019)**

| ICCC3                                                             | Year of diagnosis | YOST 1 Count | YOS T1 IR | YOS T1 APC | YOST 1 APC CI | YOST 2 Count | YOS T2 IR | YOS T2 APC | YOST 2 APC CI | YOST 3 Count | YOS T3 IR | YOS T3 APC | YOST 3 APC CI | YOST 4 Count | YOS T4 IR | YOS T4 APC | YOST 4 APC CI | YOST 5 Count | YOS T5 IR | YOS T5 APC | YOST 5 APC CI  |
|-------------------------------------------------------------------|-------------------|--------------|-----------|------------|---------------|--------------|-----------|------------|---------------|--------------|-----------|------------|---------------|--------------|-----------|------------|---------------|--------------|-----------|------------|----------------|
| Overall                                                           | 2006-2018         | 9494         | 15.7      | 1.6        | (0.6 - 2.6)   | 9256         | 17.0      | 1.6        | (0.7 - 2.5)   | 9586         | 17.9      | 1.4        | (0.8 - 2)     | 11017        | 18.6      | .8         | (0.1 - 1.5)   | 14496        | 20.2      | .3         | (-0.1 - 0.7)   |
| I LEUKEMIAS, MYELOPROLIFERATIVE AND MYELOYDYSPLASTIC DISEASES     | 2006-2018         | 2825         | 4.7       | .7         | (-0.3 - 1.7)  | 2669         | 4.9       | .9         | (0.1 - 1.8)   | 2593         | 4.8       | 1.3        | (-0.2 - 2.7)  | 2892         | 4.9       | 1.0        | (-0.2 - 2.3)  | 3474         | 4.9       | -.8        | (-1.6 - -0.1)  |
| Ia Lymphoid leukemias                                             | 2006-2018         | 2036         | 3.4       | .7         | (-0.2 - 1.6)  | 1940         | 3.6       | .7         | (-0.4 - 1.9)  | 1897         | 3.6       | .9         | (-0.4 - 2.2)  | 2094         | 3.6       | 1.1        | (-0.3 - 2.5)  | 2564         | 3.6       | -.6        | (-1.4 - 0.3)   |
| Ib Acute myeloid leukemias                                        | 2006-2018         | 513          | .8        | .4         | (-2.2 - 3)    | 469          | .9        | 1.2        | (-1.9 - 4.4)  | 448          | .8        | 1.6        | (-1.6 - 4.8)  | 522          | .9        | 1.4        | (-0.9 - 3.8)  | 577          | .8        | -1.4       | (-2.9 - 0.1)   |
| Ic Chronic myeloproliferative diseases                            | 2006-2018         | 124          | .2        | 1.7        | (-1.9 - 5.4)  | 121          | .2        | 1.8        | (-2.6 - 6.5)  | 123          | .2        | 2.0        | (-3.5 - 7.8)  | 114          | .2        | -4.1       | (-9 - 1.1)    | 174          | .2        | -1.4       | (-4 - 1.3)     |
| Id Myelodysplastic syndrome and other myeloproliferative diseases | 2006-2018         | 85           | .1        | .5         | (-5.6 - 7.1)  | 77           | .1        | -1.2       | (-9.8 - 8.1)  | 86           | .2        | 5.9        | (1.1 - 11.1)  | 95           | .2        | -.1        | (-6.6 - 6.9)  | 101          | .1        | -6.3       | (-11.7 - -0.6) |
| Ie Unspecified and other specified leukemias                      | 2006-2018         | 67           | .1        | .6         | (-4.6 - 6)    | 62           | .1        | 5.9        | (-1.6 - 14)   | 39           | .1        | 6.3        | (-1.2 - 14.4) | 67           | .1        | 5.7        | (0.1 - 11.7)  | 58           | .1        | 6.1        | (-0.5 - 13.1)  |
| II LYMPHOMAS AND RETICULOENDOTHELIAL NEOPLASMS                    | 2006-2018         | 1516         | 2.5       | 2.5        | (0.7 - 4.4)   | 1383         | 2.6       | 2.5        | (0.7 - 4.2)   | 1427         | 2.7       | 2.2        | (0.9 - 3.5)   | 1742         | 2.9       | 2.1        | (0.7 - 3.6)   | 2411         | 3.3       | 2.1        | (-0.1 - 4.3)   |
| Ila Hodgkin lymphomas                                             | 2006-2018         | 624          | 1.1       | .3         | (-2 - 2.7)    | 548          | 1.0       | -2.5       | (-3.8 - -1.2) | 628          | 1.2       | -.2        | (-2.6 - 2.3)  | 733          | 1.2       | .7         | (-1.4 - 2.9)  | 1052         | 1.4       | -.9        | (-2.4 - 0.5)   |
| Ilb Non-Hodgkin lymphomas (except Burkitt lymphoma)               | 2006-2018         | 572          | 1.0       | 3.3        | (0.3 - 6.5)   | 481          | .9        | 3.8        | (0.7 - 7)     | 485          | .9        | 2.1        | (-0.1 - 4.4)  | 612          | 1.0       | 1.5        | (-1.3 - 4.5)  | 830          | 1.1       | 3.0        | (-1 - 7.3)     |
| Ilc Burkitt lymphoma                                              | 2006-2018         | 107          | .2        | -3.5       | (-10.4 - 4)   | 123          | .2        | 1.8        | (-3.9 - 7.8)  | 127          | .2        | 2.3        | (-3.5 - 8.4)  | 154          | .3        | -.6        | (-3.6 - 2.5)  | 209          | .3        | -.3        | (-3.2 - 2.7)   |
| Ild Miscellaneous                                                 | 2006-2018         | 188          | .3        | 8.1        | (-1.3 - 18.4) | 211          | .4        | 10.2       | (-1.1 - 22.8) | 166          | .3        | 12.0       | (2.9 - 21.8)  | 221          | .4        | 8.5        | (-2.5 - 20.6) | 304          | .4        | 8.1        | (-1 - 18.1)    |

|                                                                  |           |      |     |      |               |      |     |      |              |      |     |      |              |      |     |      |              |      |     |      |               |
|------------------------------------------------------------------|-----------|------|-----|------|---------------|------|-----|------|--------------|------|-----|------|--------------|------|-----|------|--------------|------|-----|------|---------------|
| lymphoreticular neoplasms                                        |           |      |     |      |               |      |     |      |              |      |     |      |              |      |     |      |              |      |     |      |               |
| Ile Unspecified lymphomas                                        | 2006-2018 | 25   | .0  | .    | (. - .)       | 20   | .0  | .    | (. - .)      | 21   | .0  | .    | (. - .)      | 22   | .0  | .    | (. - .)      | 16   | .0  | .    | (. - .)       |
| III CNS AND MISCELLANEOUS INTRACRANIAL AND INTRASPINAL NEOPLASMS | 2006-2018 | 1450 | 2.4 | .6   | (-0.9 - 2.2)  | 1454 | 2.7 | .9   | (-1.4 - 3.2) | 1580 | 3.0 | .4   | (-1.3 - 2.1) | 1877 | 3.2 | -.8  | (-2.5 - 1)   | 2477 | 3.4 | -.4  | (-1.8 - 1)    |
| IIIa1 Ependymomas                                                | 2006-2018 | 118  | .2  | -2.0 | (-7.9 - 4.3)  | 135  | .2  | 4.6  | (1.4 - 7.9)  | 126  | .2  | -1.0 | (-6.1 - 4.4) | 152  | .3  | .0   | (-4.1 - 4.3) | 183  | .3  | 1.7  | (-2 - 5.6)    |
| IIIb Astrocytomas                                                | 2006-2018 | 711  | 1.2 | 2.1  | (0 - 4.2)     | 741  | 1.4 | -.6  | (-3.5 - 2.3) | 792  | 1.5 | 1.0  | (-1.8 - 3.9) | 943  | 1.6 | -1.4 | (-3.5 - 0.7) | 1289 | 1.8 | .0   | (-1.8 - 1.9)  |
| IIIc1 Medulloblastomas                                           | 2006-2018 | 192  | .3  | -.6  | (-5.9 - 5)    | 191  | .4  | 3.0  | (-2.8 - 9.2) | 216  | .4  | 1.2  | (-2.2 - 4.7) | 261  | .4  | 1.9  | (-0.9 - 4.7) | 324  | .4  | -.4  | (-2.3 - 1.5)  |
| IIIc2 Primitive neuroectodermal tumor (PNET)                     | 2006-2018 | 59   | .1  | .    | (. - .)       | 46   | .1  | .    | (. - .)      | 52   | .1  | .    | (. - .)      | 65   | .1  | .    | (. - .)      | 76   | .1  | -6.8 | (-14.5 - 1.5) |
| IIIc3/c4 Medulloepithelioma/Atypical teratoid/rhabdoid tumor     | 2006-2018 | 56   | .1  | 8.3  | (0.6 - 16.5)  | 49   | .1  | -1.5 | (-7.5 - 4.8) | 61   | .1  | 3.2  | (-2.1 - 8.9) | 62   | .1  | .0   | (-7.8 - 8.6) | 76   | .1  | 1.9  | (-4.6 - 8.9)  |
| IIId Other gliomas                                               | 2006-2018 | 245  | .4  | -1.0 | (-3.6 - 1.8)  | 235  | .4  | 2.3  | (-2.7 - 7.6) | 281  | .5  | .3   | (-2.8 - 3.5) | 313  | .5  | .1   | (-3.2 - 3.6) | 440  | .6  | -1.3 | (-5.2 - 2.7)  |
| IIIe Other specified intracranial and intraspinal neoplasms      | 2006-2018 | 34   | .1  | -3.7 | (-13.8 - 7.5) | 32   | .1  | .    | (. - .)      | 26   | .0  | .    | (. - .)      | 36   | .1  | .    | (. - .)      | 53   | .1  | .7   | (-7.2 - 9.4)  |
| IIIf Unspecified intracranial and intraspinal neoplasms          | 2006-2018 | 21   | .0  | .    | (. - .)       | 15   | .0  | .    | (. - .)      | 10   | .0  | .    | (. - .)      | 23   | .0  | .    | (. - .)      | 19   | .0  | .    | (. - .)       |
| IV NEUROBLASTOMA AND OTHER PERIPHERAL NERVOUS CELL TUMORS        | 2006-2018 | 407  | .6  | -1.0 | (-4 - 2)      | 384  | .7  | .9   | (-1.5 - 3.4) | 424  | .8  | -1.0 | (-3.4 - 1.5) | 507  | .9  | 1.4  | (-1.1 - 4)   | 601  | .9  | -.8  | (-3.7 - 2.1)  |
| IVa Neuroblastoma and ganglioneuroblastoma                       | 2006-2018 | 394  | .6  | -1.1 | (-4.1 - 1.9)  | 372  | .7  | .9   | (-1.8 - 3.6) | 406  | .7  | -.7  | (-3 - 1.6)   | 495  | .8  | 1.2  | (-1.2 - 3.7) | 582  | .9  | -.8  | (-3.7 - 2.3)  |

|                                                     |           |     |    |     |               |     |    |      |                |     |    |      |              |     |    |      |              |     |     |      |               |
|-----------------------------------------------------|-----------|-----|----|-----|---------------|-----|----|------|----------------|-----|----|------|--------------|-----|----|------|--------------|-----|-----|------|---------------|
| IVb Other peripheral nervous cell tumors            | 2006-2018 | 13  | .0 | .   | (. - .)       | 12  | .0 | .    | (. - .)        | 18  | .0 | .    | (. - .)      | 12  | .0 | .    | (. - .)      | 19  | .0  | .    | (. - .)       |
| V RETINOBLASTOMA                                    | 2006-2018 | 207 | .3 | .6  | (-4.1 - 5.6)  | 197 | .3 | -1.0 | (-4.4 - 2.6)   | 178 | .3 | -1.1 | (-4.2 - 2.1) | 163 | .3 | -1.4 | (-5.4 - 2.9) | 206 | .3  | -3   | (-3.1 - 2.6)  |
| VI RENAL TUMORS                                     | 2006-2018 | 374 | .6 | .8  | (-2 - 3.7)    | 344 | .6 | -.1  | (-5.2 - 5.2)   | 381 | .7 | 1.3  | (-1.9 - 4.6) | 405 | .7 | 1.2  | (-0.7 - 3.1) | 461 | .7  | -.4  | (-2.6 - 1.7)  |
| VIa1 Nephroblastoma                                 | 2006-2018 | 327 | .5 | .8  | (-2.6 - 4.3)  | 284 | .5 | -.9  | (-5.4 - 3.9)   | 322 | .6 | -.4  | (-4 - 3.3)   | 342 | .6 | 1.1  | (-1.5 - 3.9) | 394 | .6  | -.3  | (-3 - 2.4)    |
| VIb Renal carcinomas                                | 2006-2018 | 33  | .1 | 2.5 | (-7 - 12.9)   | 39  | .1 | .    | (. - .)        | 38  | .1 | .    | (. - .)      | 38  | .1 | .    | (. - .)      | 48  | .1  | 1.9  | (-3.9 - 7.9)  |
| VIc Unspecified malignant renal tumors              | 2006-2018 | 1   | .0 | .   | (. - .)       | 2   | .0 | .    | (. - .)        | 1   | .0 | .    | (. - .)      | 1   | .0 | .    | (. - .)      | 3   | .0  | .    | (. - .)       |
| VII HEPATIC TUMORS                                  | 2006-2018 | 151 | .2 | 1.3 | (-3.6 - 6.4)  | 146 | .3 | -2.9 | (-7.5 - 1.9)   | 154 | .3 | 2.9  | (-1.3 - 7.3) | 153 | .3 | -.9  | (-6.3 - 4.7) | 214 | .3  | .9   | (-2.5 - 4.4)  |
| VIIa Hepatoblastoma and mesenchymal tumors of liver | 2006-2018 | 115 | .2 | 2.9 | (-2.4 - 8.4)  | 114 | .2 | -2.4 | (-8.7 - 4.3)   | 121 | .2 | 3.5  | (-0.7 - 7.9) | 116 | .2 | 3.0  | (-2.4 - 8.8) | 166 | .2  | -.1  | (-4.2 - 4.3)  |
| VIIb Hepatic carcinomas                             | 2006-2018 | 36  | .1 | .   | (. - .)       | 31  | .1 | -7.6 | (-14.5 - -0.1) | 33  | .1 | .    | (. - .)      | 37  | .1 | .    | (. - .)      | 48  | .1  | 4.6  | (-1 - 10.5)   |
| VIIc Unspecified malignant hepatic tumors           | 2006-2018 | 0   | .0 | .   | (. - .)       | 1   | .0 | .    | (. - .)        | 0   | .0 | .    | (. - .)      | 0   | .0 | .    | (. - .)      | 0   | .0  | .    | (. - .)       |
| VIII MALIGNANT BONE TUMORS                          | 2006-2018 | 438 | .7 | 2.0 | (-2.1 - 6.2)  | 456 | .9 | 2.4  | (-0.6 - 5.6)   | 501 | .9 | .4   | (-3 - 3.8)   | 533 | .9 | -1.4 | (-4.2 - 1.4) | 760 | 1.0 | .7   | (-0.9 - 2.4)  |
| VIIIa Osteosarcomas                                 | 2006-2018 | 278 | .5 | 1.9 | (-3.1 - 7.2)  | 266 | .5 | 2.4  | (-1.4 - 6.3)   | 257 | .5 | .4   | (-3.9 - 4.8) | 321 | .5 | -1.4 | (-4.6 - 1.8) | 427 | .6  | 2.3  | (-0.5 - 5.2)  |
| VIIIb Chondrosarcomas                               | 2006-2018 | 12  | .0 | .   | (. - .)       | 21  | .0 | .    | (. - .)        | 29  | .1 | .    | (. - .)      | 17  | .0 | .    | (. - .)      | 30  | .0  | -3.1 | (-12.3 - 7.1) |
| VIIIc Ewing tumor and related sarcomas of bone      | 2006-2018 | 108 | .2 | 1.8 | (-4 - 8)      | 142 | .3 | 2.5  | (-1.8 - 7.1)   | 181 | .3 | -.5  | (-4.4 - 3.6) | 156 | .3 | .1   | (-4.3 - 4.7) | 249 | .3  | -.4  | (-3.8 - 3.1)  |
| VIIIId Other specified malignant bone tumors        | 2006-2018 | 25  | .0 | 4.3 | (-2.6 - 11.7) | 17  | .0 | .    | (. - .)        | 22  | .0 | .    | (. - .)      | 32  | .1 | .    | (. - .)      | 38  | .1  | -6.8 | (-14.7 - 1.9) |
| VIIIe Unspecified malignant bone tumors             | 2006-2018 | 15  | .0 | .   | (. - .)       | 10  | .0 | .    | (. - .)        | 12  | .0 | .    | (. - .)      | 7   | .0 | .    | (. - .)      | 16  | .0  | .    | (. - .)       |

|                                                                               |           |     |     |      |               |     |     |      |               |     |     |      |              |     |     |      |               |     |     |      |              |
|-------------------------------------------------------------------------------|-----------|-----|-----|------|---------------|-----|-----|------|---------------|-----|-----|------|--------------|-----|-----|------|---------------|-----|-----|------|--------------|
| IX SOFT TISSUE AND OTHER EXTRAOSSEOUS SARCOMAS                                | 2006-2018 | 624 | 1.0 | 1.1  | (-1.8 - 4.1)  | 633 | 1.2 | .9   | (-1.6 - 3.4)  | 616 | 1.2 | -1.2 | (-3 - 0.5)   | 698 | 1.2 | 1.1  | (-1 - 3.2)    | 929 | 1.3 | -.7  | (-1.8 - 0.5) |
| IXa Rhabdomyosarcomas                                                         | 2006-2018 | 211 | .3  | -1.7 | (-5.4 - 2.2)  | 236 | .4  | -.8  | (-3.6 - 2)    | 238 | .4  | -1.9 | (-4.4 - 0.7) | 251 | .4  | 3.4  | (0.3 - 6.6)   | 345 | .5  | -2.1 | (-5 - 0.8)   |
| IXb Fibrosarcomas, peripheral nerve sheath tumors and other fibrous neoplasms | 2006-2018 | 65  | .1  | 3.5  | (-5 - 12.7)   | 60  | .1  | .3   | (-7.7 - 8.9)  | 56  | .1  | -1.8 | (-8.3 - 5.2) | 77  | .1  | -1.0 | (-8.7 - 7.3)  | 99  | .1  | .7   | (-5.9 - 7.9) |
| IXc Kaposi sarcoma                                                            | 2006-2018 | 7   | .0  | .    | (. - .)       | 1   | .0  | .    | (. - .)       | 2   | .0  | .    | (. - .)      | 0   | .0  | .    | (. - .)       | 2   | .0  | .    | (. - .)      |
| IXd1 Ewing tumor and Askin tumor of soft tissue                               | 2006-2018 | 37  | .1  | .    | (. - .)       | 32  | .1  | .    | (. - .)       | 43  | .1  | -2.8 | (-9 - 3.8)   | 48  | .1  | -3.7 | (-10.7 - 3.9) | 61  | .1  | -2.5 | (-11 - 6.9)  |
| IXd2 Peripheral neuroectodermal tumor (pPNET) of soft tissue                  | 2006-2018 | 13  | .0  | .    | (. - .)       | 16  | .0  | .    | (. - .)       | 16  | .0  | .    | (. - .)      | 20  | .0  | -.3  | (-7.7 - 7.6)  | 29  | .0  | .    | (. - .)      |
| IXe Unspecified soft tissue sarcomas                                          | 2006-2018 | 68  | .1  | -.2  | (-4.6 - 4.3)  | 72  | .1  | 3.0  | (-1.9 - 8.1)  | 78  | .1  | 1.4  | (-3.7 - 6.9) | 83  | .1  | 1.7  | (-4.8 - 8.6)  | 98  | .1  | 1.8  | (-2.4 - 6.2) |
| X GERM CELL TUMORS, TROPHOBLASTIC TUMORS AND NEOPLASMS OF GONADS              | 2006-2018 | 632 | 1.0 | 3.5  | (-0.3 - 7.5)  | 632 | 1.2 | -.3  | (-2.9 - 2.4)  | 664 | 1.2 | .9   | (-1.4 - 3.3) | 693 | 1.2 | -.9  | (-2.7 - 1)    | 913 | 1.3 | -1.1 | (-2.3 - 0.1) |
| Xa Intracranial and intraspinal germ cell tumors                              | 2006-2018 | 90  | .2  | 8.6  | (0.2 - 17.7)  | 100 | .2  | -2.8 | (-5.5 - -0.1) | 94  | .2  | 1.5  | (-3.4 - 6.6) | 116 | .2  | -2.4 | (-6.5 - 1.9)  | 157 | .2  | -.8  | (-4.6 - 3.1) |
| Xb Malignant extracranial and extragonadal germ cell tumors                   | 2006-2018 | 74  | .1  | -3.6 | (-10.3 - 3.7) | 72  | .1  | -4.5 | (-11.7 - 3.2) | 101 | .2  | -.2  | (-5.6 - 5.6) | 75  | .1  | -2.1 | (-7.8 - 4.1)  | 108 | .2  | 1.3  | (-4.7 - 7.7) |
| Xc Malignant gonadal germ cell tumors                                         | 2006-2018 | 426 | .7  | 3.8  | (-0.4 - 8.2)  | 416 | .8  | 1.1  | (-2.4 - 4.8)  | 435 | .8  | .4   | (-2.8 - 3.7) | 451 | .7  | -.7  | (-3.2 - 1.8)  | 602 | .8  | -1.6 | (-3.6 - 0.4) |

|                                                                 |           |     |     |      |               |     |     |      |               |      |     |      |              |      |     |      |              |      |     |      |               |
|-----------------------------------------------------------------|-----------|-----|-----|------|---------------|-----|-----|------|---------------|------|-----|------|--------------|------|-----|------|--------------|------|-----|------|---------------|
| Xd Gonadal carcinomas                                           | 2006-2018 | 21  | .0  | .    | (. - .)       | 25  | .0  | .    | (. - .)       | 23   | .0  | .    | (. - .)      | 34   | .1  | -1.5 | (-7.8 - 5.3) | 31   | .0  | .    | (. - .)       |
| Xe Other and unspecified malignant gonadal tumors               | 2006-2018 | 21  | .0  | .    | (. - .)       | 19  | .0  | .    | (. - .)       | 11   | .0  | .    | (. - .)      | 17   | .0  | .    | (. - .)      | 15   | .0  | .    | (. - .)       |
| XI OTHER MALIGNANT EPITHELIAL NEOPLASMS AND MALIGNANT MELANOMAS | 2006-2018 | 821 | 1.4 | 5.3  | (3.7 - 7)     | 914 | 1.7 | 6.9  | (4.9 - 9)     | 1030 | 1.9 | 5.4  | (2.7 - 8.2)  | 1294 | 2.2 | 2.8  | (1.3 - 4.3)  | 1981 | 2.7 | 2.5  | (1.2 - 3.9)   |
| XIa Adrenocortical carcinomas                                   | 2006-2018 | 14  | .0  | .    | (. - .)       | 11  | .0  | .    | (. - .)       | 14   | .0  | .    | (. - .)      | 10   | .0  | .    | (. - .)      | 20   | .0  | .    | (. - .)       |
| XIb Thyroid carcinomas                                          | 2006-2018 | 382 | .6  | 7.7  | (4.3 - 11.3)  | 443 | .8  | 4.9  | (1.6 - 8.4)   | 468  | .9  | 3.6  | (0.5 - 6.9)  | 638  | 1.1 | 3.0  | (0.7 - 5.4)  | 898  | 1.2 | 3.6  | (2.3 - 4.8)   |
| XIc Nasopharyngeal carcinomas                                   | 2006-2018 | 48  | .1  | -5.4 | (-13.3 - 3.3) | 32  | .1  | .    | (. - .)       | 22   | .0  | .    | (. - .)      | 22   | .0  | .    | (. - .)      | 28   | .0  | .    | (. - .)       |
| XId Malignant melanomas                                         | 2006-2018 | 97  | .2  | -5   | (-5.2 - 4.5)  | 117 | .2  | 1.3  | (-2.8 - 5.5)  | 192  | .4  | -5   | (-6 - 5.4)   | 277  | .5  | -2.3 | (-4.7 - 0.1) | 528  | .7  | -3.8 | (-6.6 - -0.9) |
| XIe Skin carcinomas                                             | 2006-2018 | 6   | .0  | .    | (. - .)       | 3   | .0  | .    | (. - .)       | 5    | .0  | .    | (. - .)      | 6    | .0  | .    | (. - .)      | 13   | .0  | .    | (. - .)       |
| XIf Other and unspecified carcinomas                            | 2006-2018 | 274 | .5  | 5.6  | (2.7 - 8.6)   | 308 | .6  | 13.3 | (10.1 - 16.7) | 329  | .6  | 12.1 | (7.7 - 16.8) | 341  | .6  | 7.2  | (4.3 - 10.1) | 494  | .7  | 8.9  | (4.2 - 13.9)  |
| XII OTHER AND UNSPECIFIED MALIGNANT NEOPLASMS                   | 2006-2018 | 39  | .1  | 1.9  | (-5 - 9.3)    | 34  | .1  | .    | (. - .)       | 30   | .1  | .    | (. - .)      | 47   | .1  | .    | (. - .)      | 54   | .1  | 4.6  | (-5 - 15.1)   |
| XIIa Other specified malignant tumors                           | 2006-2018 | 26  | .0  | .    | (. - .)       | 19  | .0  | .    | (. - .)       | 18   | .0  | .    | (. - .)      | 31   | .1  | .    | (. - .)      | 36   | .1  | 5.8  | (-4.2 - 16.9) |
| XIIb Other unspecified malignant tumors                         | 2006-2018 | 13  | .0  | .    | (. - .)       | 15  | .0  | .    | (. - .)       | 12   | .0  | .    | (. - .)      | 16   | .0  | .    | (. - .)      | 18   | .0  | .    | (. - .)       |



**Supplementary Table 5. Annual percentage changes (APCs) and 95% confidence intervals (95% CIs) by age at diagnosis grouping and sex among children and adolescents aged 0-19 at diagnosis stratified by age grouping among children with ALL, SEER 22 (2000-2019)**

| ICCC3                 | Year of diagnosis | Pediatric age groups | Overall Count | Overall IR | Overall APC | Overall APC CI | Male Count | Male IR | Male APC | Male APC CI  | Female Count | Female IR | Female APC | Female APC CI |
|-----------------------|-------------------|----------------------|---------------|------------|-------------|----------------|------------|---------|----------|--------------|--------------|-----------|------------|---------------|
| la Lymphoid leukemias | 2000-2019         | 00 years             | 809           | 2.1        | -1.7        | (-2.7 - -0.7)  | 404        | 2.0     | -.7      | (-2.8 - 1.3) | 405          | 2.1       | -2.7       | (-4.1 - -1.3) |
| la Lymphoid leukemias | 2000-2019         | 01-04 years          | 12284         | 7.8        | .2          | (-0.2 - 0.5)   | 6683       | 8.3     | .0       | (-0.4 - 0.5) | 5601         | 7.3       | .3         | (-0.2 - 0.8)  |
| la Lymphoid leukemias | 2000-2019         | 05-09 years          | 7128          | 3.6        | .8          | (0.3 - 1.2)    | 3969       | 3.9     | 1.2      | (0.5 - 1.8)  | 3159         | 3.3       | .2         | (-0.4 - 0.8)  |
| la Lymphoid leukemias | 2000-2019         | 10-14 years          | 4652          | 2.3        | 1.4         | (0.8 - 2)      | 2657       | 2.5     | 1.4      | (0.6 - 2.3)  | 1995         | 2.0       | 1.4        | (0.7 - 2.1)   |
| la Lymphoid leukemias | 2000-2019         | 15-19 years          | 3813          | 1.8        | .9          | (0.4 - 1.4)    | 2582       | 2.4     | 1.2      | (0.5 - 1.8)  | 1231         | 1.2       | .3         | (-0.8 - 1.4)  |

**Supplementary Table 6. Annual percentage changes (APCs) and 95% confidence intervals (95% CIs) by age at diagnosis grouping and race/ethnicity among children and adolescents aged 0-19 at diagnosis stratified by age grouping among children with ALL, SEER 22 (2000-2019)**

| ICCC3                 | Year of diagnosis | Pediatric age groups | NHW Count | NH W IR | NHW APC | NHW APC CI   | NHB Count | NH B IR | NHB APC | NHB APC CI   | AIAN Count | AIA N IR | AIAN APC | AIAN APC CI  | API Count | AP I IR | API APC | API APC CI   | Hisp Count | His p IR | Hisp APC | Hisp APC CI   |
|-----------------------|-------------------|----------------------|-----------|---------|---------|--------------|-----------|---------|---------|--------------|------------|----------|----------|--------------|-----------|---------|---------|--------------|------------|----------|----------|---------------|
| la Lymphoid leukemias | 2000-2019         | 00 years             | 361       | 2.0     | -2.0    | (-4.1 - 0.1) | 81        | 1.6     | -.3     | (-4.3 - 4)   | 8          | 3.0      | .        | (. - .)      | 56        | 1.8     | .       | (. - .)      | 294        | 2.2      | -2.1     | (-3.9 - -0.2) |
| la Lymphoid leukemias | 2000-2019         | 01-04 years          | 5929      | 8.3     | -.1     | (-0.6 - 0.4) | 733       | 3.6     | .9      | (-0.7 - 2.6) | 92         | 8.5      | 1.9      | (-1.5 - 5.4) | 856       | 7.1     | -.4     | (-1.6 - 0.8) | 4561       | 8.8      | .3       | (-0.2 - 0.7)  |
| la Lymphoid leukemias | 2000-2019         | 05-09 years          | 3136      | 3.4     | .7      | (0.1 - 1.4)  | 493       | 1.9     | .5      | (-1 - 2)     | 41         | 2.9      | 2.2      | (-1.6 - 6.1) | 469       | 3.2     | .1      | (-1.7 - 1.8) | 2942       | 4.7      | .4       | (-0.2 - 0.9)  |
| la Lymphoid leukemias | 2000-2019         | 10-14 years          | 1886      | 1.9     | .4      | (-0.4 - 1.2) | 396       | 1.4     | .2      | (-1.8 - 2.4) | 31         | 2.1      | .        | (. - .)      | 306       | 2.1     | 1.7     | (-0.4 - 3.9) | 2006       | 3.3      | 1.7      | (0.8 - 2.7)   |
| la Lymphoid leukemias | 2000-2019         | 15-19 years          | 1604      | 1.6     | -.4     | (-1.1 - 0.2) | 263       | .9      | .5      | (-1.9 - 2.9) | 27         | 1.7      | .        | (. - .)      | 204       | 1.4     | 1.6     | (-0.6 - 3.8) | 1693       | 2.8      | 1.4      | (0.7 - 2)     |
